# Supplementary material
Source: HighWire-hosted journal article supplement (https://dmd.aspetjournals.org/highwire/filestream/66277/field_highwire_adjunct_files/0/Supplementary_Table_S1.pdf)
Supplement: Supplementary_Table_S1.pdf [file Supplementary_Table_S1.pdf]

## Dug Metabolism and Disposition

### Drug transporters on arachnoid barrier cells contribute to the blood-cerebrospinal fluid barrier

Kazuto Yasuda, Cynthia Cline, Peter Vogel, Mihaela Onciu, Soghra Fatima, Brian P. Sorrentino, Ranjit K. Thirumaran, Sean Ekins, Yoshihiro

Urade, Ko Fujimori and Erin G. Schuetz

#### Supplemental Table S1.

Primers used for quantitative real-time PCR analysis

| Gene              |    | Forward                 |    |    | Reverse                 |    | Length (bp) | Annealing temperature (°C) |
|-------------------|----|-------------------------|----|----|-------------------------|----|-------------|----------------------------|
| <i>Gapdh</i>      | 5' | ACCACAGTCCATGCCATCAC    | 3' | 5' | TCCACCACCCTGTTGCTGTA    | 3' | 452         |                            |
| <i>L-Ptgds</i>    | 5' | AGGGCCCAGGCCAGGACTTC    | 3' | 5' | GCCCTGGGCCTTGCTAAAGGT   | 3' | 104         | 60                         |
| <i>Abcb1</i>      | 5' | TGCCACCACGATCGCCGAGA    | 3' | 5' | TCAGCTGCGCCCCTCTCTCA    | 3' | 155         | 60                         |
| <i>Abcg2</i>      | 5' | CCATAGCCACAGGCCAAAGT    | 3' | 5' | GGGCCACATGATTCTTCCAC    | 3' | 327         | 60                         |
| <i>Oat1</i>       | 5' | GGCCAGCCGCTGCCTGATACA   | 3' | 5' | GATGGTGGGACCTGCAGAACCCC | 3' | 190         | 60                         |
| <i>Oat3</i>       | 5' | GCTTGAGACCCTCAATCGGCCCT | 3' | 5' | AAGGGCCCTGCTTGGGATCAGT  | 3' | 198         | 60                         |
| <i>Cyp1b1</i>     | 5' | ACATCCCCAAGAATACGGTC    | 3' | 5' | TAGACAGTTCCTCACCGATG    | 3' | 192         | 50                         |
| <i>Car, Nr1i3</i> | 5' | AGGTGTGAGGTCAGCAAGGC    | 3' | 5' | AATGGGCCACATGGCGAGT     | 3' | 230         | 60                         |
| <i>Mrp1</i>       | 5' | GCCTGGGCCCTTCTGTGCTG    | 3' | 5' | AAGGCCAGCTCCCAGGCGTA    | 3' | 190         | 60                         |
| <i>Mrp4</i>       | 5' | GGTTGGAATTGTGGGCAGAA    | 3' | 5' | TCGTCCGTGTGCTCATTGAA    | 3' | 222         | 53                         |
